# Supplementary material
Source: MDPI journal article supplement (https://www.mdpi.com/2071-1050/16/10/4044)
Supplement: s1 [file s1]

Supplementary submitted to Sustainability

# **Derivation of landslide rainfall thresholds by geostatistical methods in Southwest China**

**Zhongyuan Xu<sup>1,2</sup>, Zhilin Xiao<sup>1\*</sup>, Xiaoyan Zhao<sup>2</sup>, Zhigang Ma<sup>1</sup>, Qun Zhang<sup>1</sup>, Pu Zeng<sup>3</sup> and Xiaoqiong Zhang<sup>3</sup>**

<sup>1</sup>Sichuan Institute of Land and Space Ecological Restoration and Geological Hazard Prevention, Chengdu 610036, Sichuan, China

<sup>2</sup>Faculty of Geosciences and Environmental Engineering, Southwest Jiaotong University, Chengdu 611756, Sichuan, China

<sup>3</sup>Natural Resources and Planning Bureau of Ya'an City, Ya'an 625099, Sichuan, China

\* Correspondence: Zhilin Xiao, xfyxzl@163.com

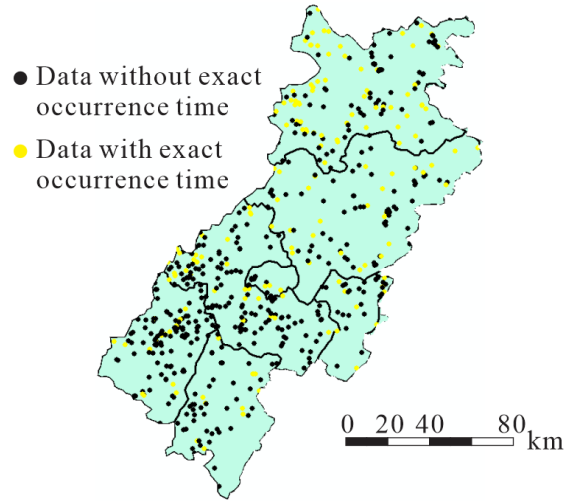

**Figure S1.** The distribution of landslide data with exact occurrence time.

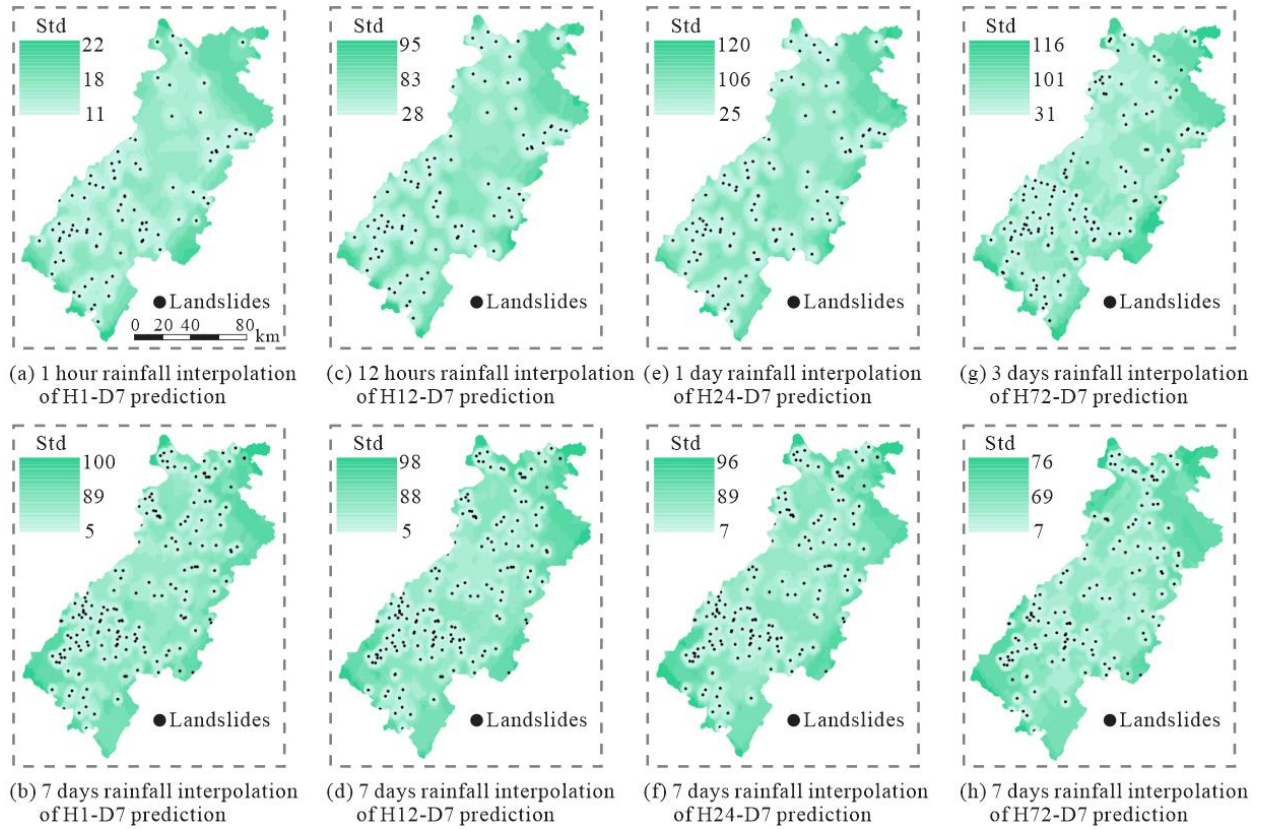

**Figure S2.** Standard deviations (Std) of Kriging interpolation in Figure 6.
